# Supplementary material for: Comparative Evaluation of Vitek 2 and Etest versus Broth Microdilution for Ceftazidime/Avibactam and Ceftolozane/Tazobactam Susceptibility Testing of Enterobacterales and Pseudomonas aeruginosa
Source: MDPI journal article supplement (doi:10.3390/antibiotics11070865), 2022-06-27
Supplement: s1 [file s1]

**Table S1.** Comparison of testing methods for the determination of susceptibility of challenge as well as ESBL-negative and carbapenem-susceptible isolates to ceftazidime/avibactam according to the current EUCAST breakpoints.

| Organism (No of isolates)                      | Assay          | Resistance rate | MIC (mg/L)      |                   |                   |
|------------------------------------------------|----------------|-----------------|-----------------|-------------------|-------------------|
|                                                |                |                 | Range           | MIC <sub>50</sub> | MIC <sub>90</sub> |
| <b>Enterobacterales (n = 83)</b>               |                | 23%             | ≤0.125 - >16    | 1                 | >16               |
| <i>K. pneumoniae</i> (n = 57)                  |                | 30%             | ≤0.125 - >16    | 1                 | >16               |
| Challenge (n = 44)                             |                | 36%             | ≤0.125 - >16    | 1                 | >16               |
| ESBL-negative, carbapenem-susceptible (n = 13) |                | 0%              | ≤0.125 - 0.5    | ≤0.125            | 0.5               |
| <i>E. coli</i> (n = 19)                        | <b>BMD</b>     | 5%              | ≤0.125 - >16    | ≤0.125            | 0.25              |
| Challenge (n = 11)                             |                | 9%              | ≤0.125 - >16    | ≤0.125            | 0.25              |
| ESBL-negative, carbapenem-susceptible (n = 8)  |                | 0%              | ≤0.125 - ≤0.125 | ≤0.125            | ≤0.125            |
| <i>E. cloacae</i> (n = 7)                      |                | 29%             | ≤0.125 - >16    | ≤0.125            | >16               |
| Challenge (n = 3)                              |                | 67%             | 0.25 - >16      | >16               | >16               |
| ESBL-negative, carbapenem-susceptible (n = 4)  |                | 0%              | ≤0.125 - ≤0.125 | ≤0.125            | ≤0.125            |
| <b>Enterobacterales (n = 83)</b>               |                | 22%             | ≤0.125 - >8     | 0.5               | >8                |
| <i>K. pneumoniae</i> (n = 57)                  |                | 28%             | ≤0.125 - >8     | 1                 | >8                |
| Challenge (n = 44)                             |                | 34%             | ≤0.125 - >8     | 1                 | >8                |
| ESBL-negative, carbapenem-susceptible (n = 13) |                | 0%              | ≤0.125 - 0.5    | ≤0.125            | 0.5               |
| <i>E. coli</i> (n = 19)                        | <b>Vitek 2</b> | 5%              | ≤0.125 - >8     | ≤0.125            | 0.25              |
| Challenge (n = 11)                             |                | 9%              | ≤0.125 - >8     | ≤0.125            | ≤0.125            |
| ESBL-negative, carbapenem-susceptible (n = 8)  |                | 0%              | ≤0.125 - 0.25   | ≤0.125            | 0.25              |
| <i>E. cloacae</i> (n = 7)                      |                | 29%             | ≤0.125 - >8     | 0.25              | >8                |
| Challenge (n = 3)                              |                | 67%             | 0.5 - >8        | >8                | >8                |
| ESBL-negative, carbapenem-susceptible (n = 4)  |                | 0%              | ≤0.125 - 0.25   | 0.25              | 0.25              |
| <b>Enterobacterales (n = 83)</b>               |                | 23%             | 0.03 - >256     | 1                 | >256              |
| <i>K. pneumoniae</i> (n = 57)                  |                | 30%             | 0.125 - >256    | 1                 | >256              |
| Challenge (n = 44)                             |                | 36%             | 0.125 - >256    | 2                 | >256              |
| ESBL-negative, carbapenem-susceptible (n = 13) |                | 0%              | 0.125 - 1       | 0.125             | 1                 |
| <i>E. coli</i> (n = 19)                        | <b>Etest</b>   | 5%              | 0.03 - >256     | 0.125             | 0.25              |
| Challenge (n = 11)                             |                | 9%              | 0.06 - >256     | 0.25              | 0.5               |
| ESBL-negative, carbapenem-susceptible (n = 8)  |                | 0%              | 0.03 - 0.125    | 0.06              | 0.125             |
| <i>E. cloacae</i> (n = 7)                      |                | 29%             | 0.25 - >256     | 0.25              | >256              |
| Challenge (n = 3)                              |                | 67%             | 1 - >256        | >256              | >256              |
| ESBL-negative, carbapenem-susceptible (n = 4)  |                | 0%              | 0.25 - 0.25     | 0.25              | 0.25              |
| <b>P. aeruginosa (n = 17)</b>                  |                | 29%             | 1 - >16         | 2                 | >16               |
| Challenge (n = 11)                             | <b>BMD</b>     | 45%             | 2 - >16         | 8                 | >16               |
| ESBL-negative, carbapenem-susceptible (n = 6)  |                | 0%              | 1 - 4           | 2                 | 4                 |
| <b>P. aeruginosa (n = 17)</b>                  |                | 29%             | 1 - >8          | 2                 | >8                |
| Challenge (n = 11)                             | <b>Vitek 2</b> | 45%             | 2 - >8          | 8                 | >8                |
| ESBL-negative, carbapenem-susceptible (n = 6)  |                | 0%              | 1 - 2           | 2                 | 2                 |
| <b>P. aeruginosa (n = 17)</b>                  |                | 24%             | 1 - 256         | 2                 | 128               |
| Challenge (n = 11)                             | <b>Etest</b>   | 36%             | 2 - 256         | 4                 | 128               |
| ESBL-negative, carbapenem-susceptible (n = 6)  |                | 0%              | 1 - 2           | 2                 | 2                 |

BMD: broth microdilution

The European Committee on Antimicrobial Susceptibility Testing (EUCAST). Breakpoint tables for interpretation of MICs and zone diameters, Version 12.0, 2022.

**Table S2.** Comparison of testing methods for the determination of susceptibility of challenge as well as ESBL-negative and carbapenem-susceptible isolates to ceftolozane/tazobactam according to the current EUCAST breakpoints.

| Organism (No of isolates)                      | Assay          | Resistance rate | MIC (mg/L)    |                   |                   |
|------------------------------------------------|----------------|-----------------|---------------|-------------------|-------------------|
|                                                |                |                 | Range         | MIC <sub>50</sub> | MIC <sub>90</sub> |
| <b><i>Enterobacterales</i> (n = 83)</b>        |                | 48%             | ≤0.25 - >32   | 1                 | >32               |
| <i>K. pneumoniae</i> (n = 57)                  |                | 69%             | ≤0.25 - >32   | >32               | >32               |
| Challenge (n = 44)                             |                | 84%             | ≤0.25 - >32   | >32               | >32               |
| ESBL-negative, carbapenem-susceptible (n = 13) |                | 0%              | ≤0.25 - 0.5   | ≤0.25             | 0.5               |
| <i>E. coli</i> (n = 19)                        | <b>BMD</b>     | 5%              | ≤0.25 - >32   | ≤0.25             | 0.5               |
| Challenge (n = 11)                             |                | 9%              | ≤0.25 - >32   | ≤0.25             | 1                 |
| ESBL-negative, carbapenem-susceptible (n = 8)  |                | 0%              | ≤0.25 - ≤0.25 | ≤0.25             | ≤0.25             |
| <i>E. cloacae</i> (n = 7)                      |                | 29%             | ≤0.25 - >32   | ≤0.25             | >32               |
| Challenge (n = 3)                              |                | 67%             | 0.5 - >32     | >32               | >32               |
| ESBL-negative, carbapenem-susceptible (n = 4)  |                | 0%              | ≤0.25 - ≤0.25 | ≤0.25             | ≤0.25             |
| <b><i>Enterobacterales</i> (n = 83)</b>        |                | 48%             | ≤0.25 - >16   | 0.5               | >16               |
| <i>K. pneumoniae</i> (n = 57)                  |                | 67%             | ≤0.25 - >16   | >16               | >16               |
| Challenge (n = 44)                             |                | 82%             | ≤0.25 - >16   | >16               | >16               |
| ESBL-negative, carbapenem-susceptible (n = 13) |                | 0%              | ≤0.25 - 0.5   | ≤0.25             | 0.5               |
| <i>E. coli</i> (n = 19)                        | <b>Vitek 2</b> | 5%              | ≤0.25 - >16   | ≤0.25             | 0.5               |
| Challenge (n = 11)                             |                | 9%              | ≤0.25 - >16   | ≤0.25             | 1                 |
| ESBL-negative, carbapenem-susceptible (n = 8)  |                | 0%              | ≤0.25 - ≤0.25 | ≤0.25             | ≤0.25             |
| <i>E. cloacae</i> (n = 7)                      |                | 29%             | ≤0.25 - >16   | ≤0.25             | 16                |
| Challenge (n = 3)                              |                | 67%             | 1 - >16       | 16                | >16               |
| ESBL-negative, carbapenem-susceptible (n = 4)  |                | 0%              | ≤0.25 - ≤0.25 | ≤0.25             | ≤0.25             |
| <b><i>Enterobacterales</i> (n = 83)</b>        |                | 47%             | 0.06 - >256   | 2                 | >256              |
| <i>K. pneumoniae</i> (n = 57)                  |                | 67%             | 0.125 - >256  | 64                | >256              |
| Challenge (n = 44)                             |                | 82%             | 0.25 - >256   | >256              | >256              |
| ESBL-negative, carbapenem-susceptible (n = 13) |                | 0%              | 0.125 - 1     | 0.125             | 1                 |
| <i>E. coli</i> (n = 19)                        | <b>Etest</b>   | 5%              | 0.06 - >256   | 0.125             | 1                 |
| Challenge (n = 11)                             |                | 9%              | 0.125 - >256  | 0.25              | 2                 |
| ESBL-negative, carbapenem-susceptible (n = 8)  |                | 0%              | 0.06 - 0.125  | 0.125             | 0.125             |
| <i>E. cloacae</i> (n = 7)                      |                | 29%             | 0.25 - >256   | 0.5               | >256              |
| Challenge (n = 3)                              |                | 67%             | 0.5 - >256    | >256              | >256              |
| ESBL-negative, carbapenem-susceptible (n = 4)  |                | 0%              | 0.25 - 0.5    | 0.25              | 0.5               |
| <b><i>P. aeruginosa</i> (n = 17)</b>           |                | 29%             | 0.5 - >32     | 0.5               | >32               |
| Challenge (n = 11)                             | <b>BMD</b>     | 45%             | 0.5 - >32     | 1                 | >32               |
| ESBL-negative, carbapenem-susceptible (n = 6)  |                | 0%              | 0.5 - 0.5     | 0.5               | 0.5               |
| <b><i>P. aeruginosa</i> (n = 17)</b>           |                | 29%             | 0.5 - >16     | 0.5               | >16               |
| Challenge (n = 11)                             | <b>Vitek 2</b> | 45%             | 0.5 - >16     | 1                 | >16               |
| ESBL-negative, carbapenem-susceptible (n = 6)  |                | 0%              | 0.5 - 0.5     | 0.5               | 0.5               |
| <b><i>P. aeruginosa</i> (n = 17)</b>           |                | 29%             | 0.5 - >256    | 1                 | >256              |
| Challenge (n = 11)                             | <b>Etest</b>   | 45%             | 0.5 - >256    | 1                 | >256              |
| ESBL-negative, carbapenem-susceptible (n = 6)  |                | 0%              | 0.5 - 0.5     | 0.5               | 0.5               |

BMD: broth microdilution

The European Committee on Antimicrobial Susceptibility Testing (EUCAST). Breakpoint tables for interpretation of MICs and zone diameters, Version 12.0, 2022.

**Table S3.** Method comparison agreement, error categories and acceptance criteria as per the ISO standard 20776-2.

| Agreement or error category                                                                                                                                                                    | Acceptance criteria |
|------------------------------------------------------------------------------------------------------------------------------------------------------------------------------------------------|---------------------|
| Category Agreement (CA)<br>Percentage of isolates (%) producing the same interpretive category result (susceptible or resistant) as compared to the reference broth microdilution (BMD) method | $\geq 90\%$ CA      |
| Essential Agreement (EA)<br>Percentage of isolates (%) producing MICs that are within $\pm$ one serial 2-fold dilution of the BMD method                                                       | $\geq 90\%$ EA      |
| Major Error (ME)<br>ME occurred when VITEK 2 AST-GN or Etest categorized a given isolate as resistant and BMD as susceptible (false resistance)                                                | $\leq 3\%$ ME       |
| Very Major Error (VME)<br>VME occurred when VITEK 2 AST-GN or Etest categorized an isolate as susceptible and BMD as resistant (false susceptibility)                                          | $\leq 3\%$ VME      |

ISO - ISO 20776-2:2021 - Clinical laboratory testing and *in vitro* diagnostic test systems - Susceptibility testing of infectious agents and evaluation of performance of antimicrobial susceptibility test devices - Part 2: Evaluation of performance of antimicrobial susceptibility test devices against reference broth micro-dilution.
